# Supplementary material
Source: PubMed Central journal article supplement (PMC1976217)

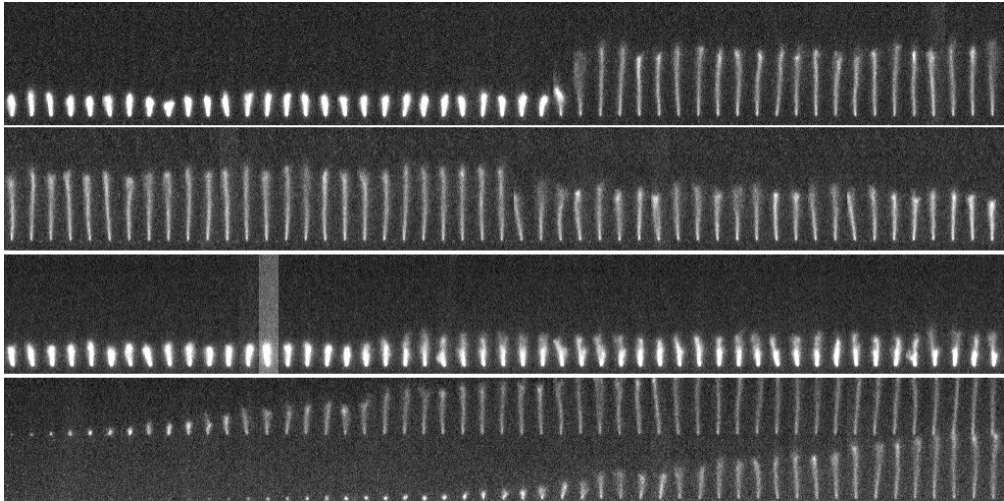

Supplement: pnas_0703274104_1.pdf [file pnas_0703274104_1.pdf]

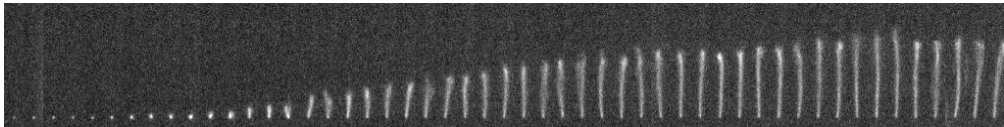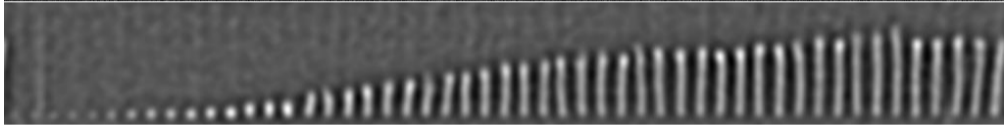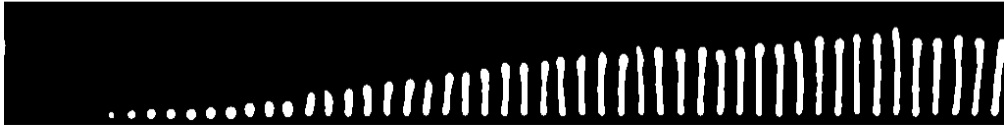

Supplement: pnas_0703274104_2.pdf [file pnas_0703274104_2.pdf]

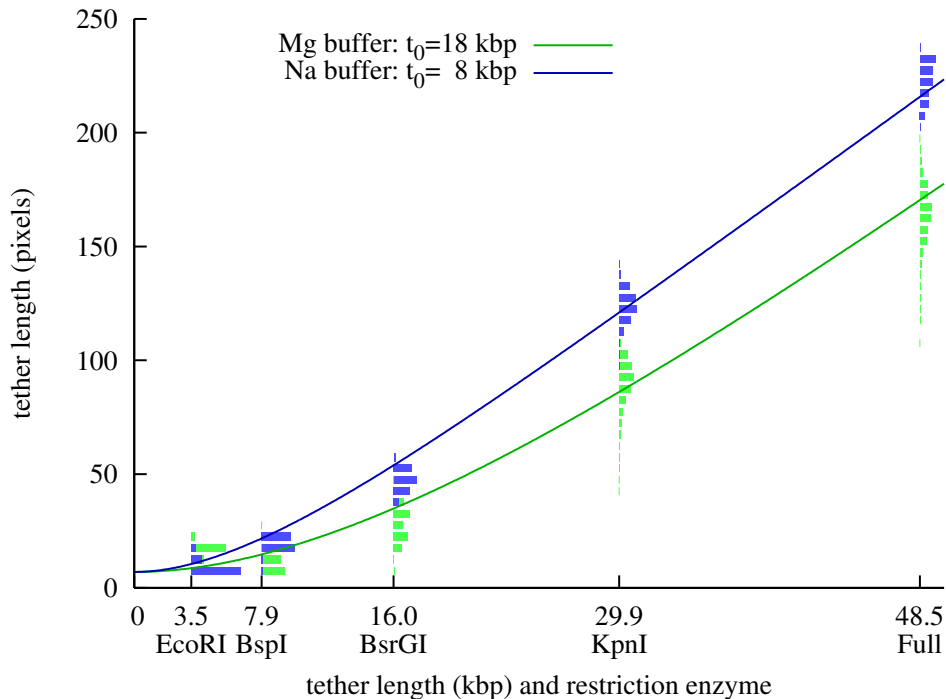

Supplement: pnas_0703274104_3.pdf [file pnas_0703274104_3.pdf]

$\lambda$ cI60 (48.5 kbp), effect of flow in 10mM  $\text{MgSO}_4$

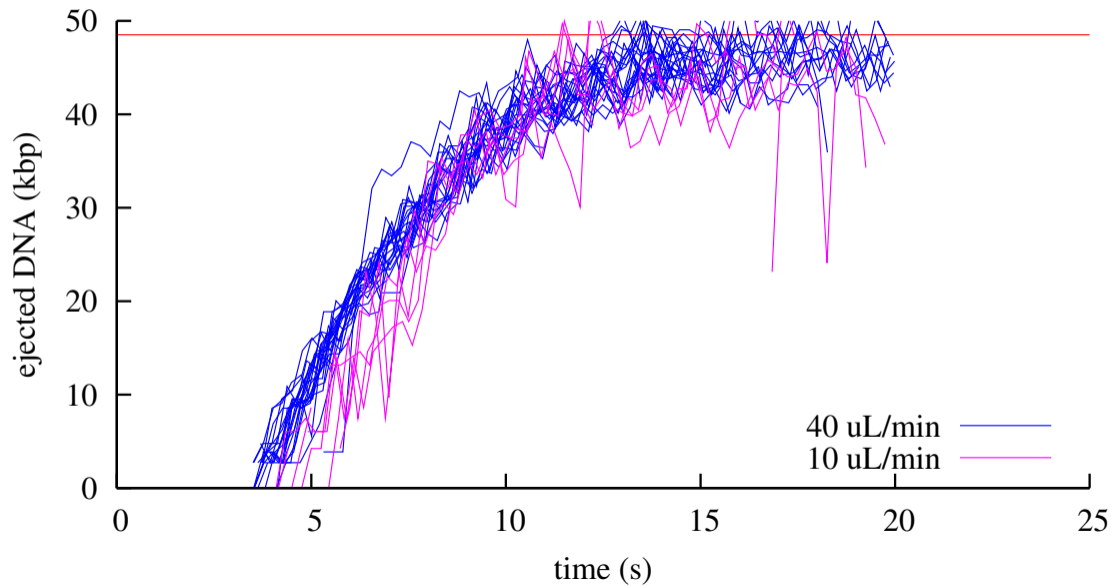

Supplement: pnas_0703274104_4.pdf [file pnas_0703274104_4.pdf]

$\lambda$ cI60 (48.5 kbp), effect of flow in 10mM MgSO<sub>4</sub>

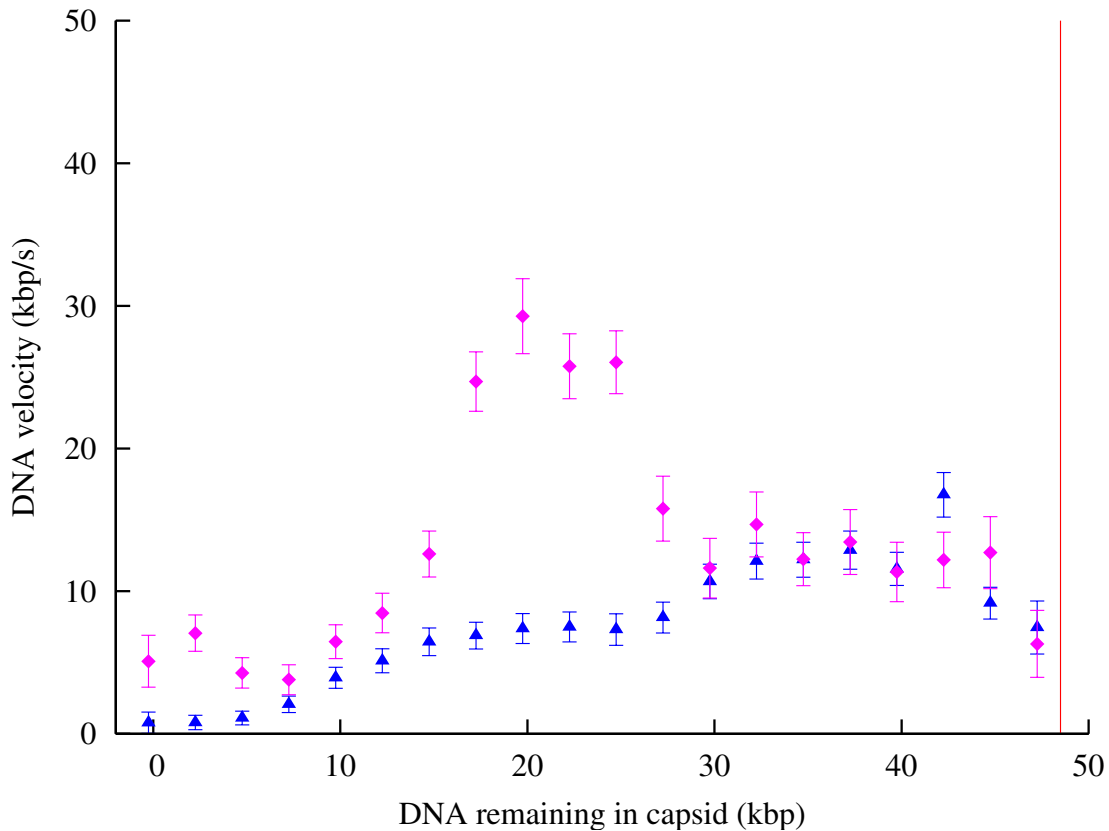

Supplement: pnas_0703274104_5.pdf [file pnas_0703274104_5.pdf]

$\lambda$ cI60 (48.5 kbp), buffer A

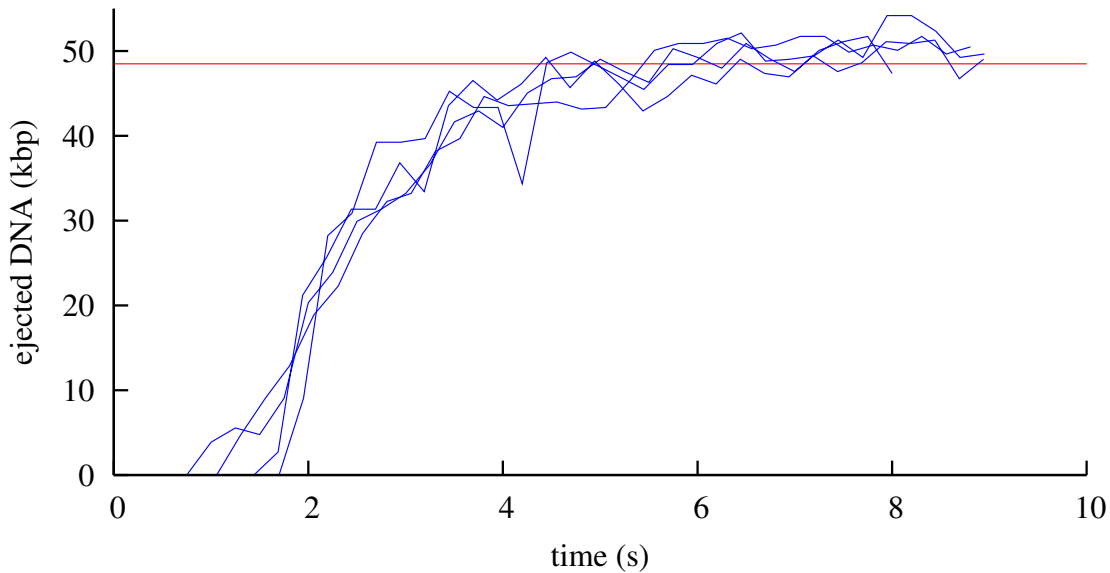

Supplement: pnas_0703274104_6.pdf [file pnas_0703274104_6.pdf]
